# Supplementary material for: Two-dimensional SixGe1−x films with variable composition made via multilayer colloidal template-guided ionic liquid electrodeposition
Source: Royal Society of Chemistry journal article supplement (doi:10.1039/c2cp43983b), 2012-12-04
Supplement: c2cp43983b.pdf [file c2cp43983b.pdf]

Fig. S1 EDX analysis of Cu substrate used for the electrodeposition of  $\text{Si}_x\text{Ge}_{1-x}$  films.

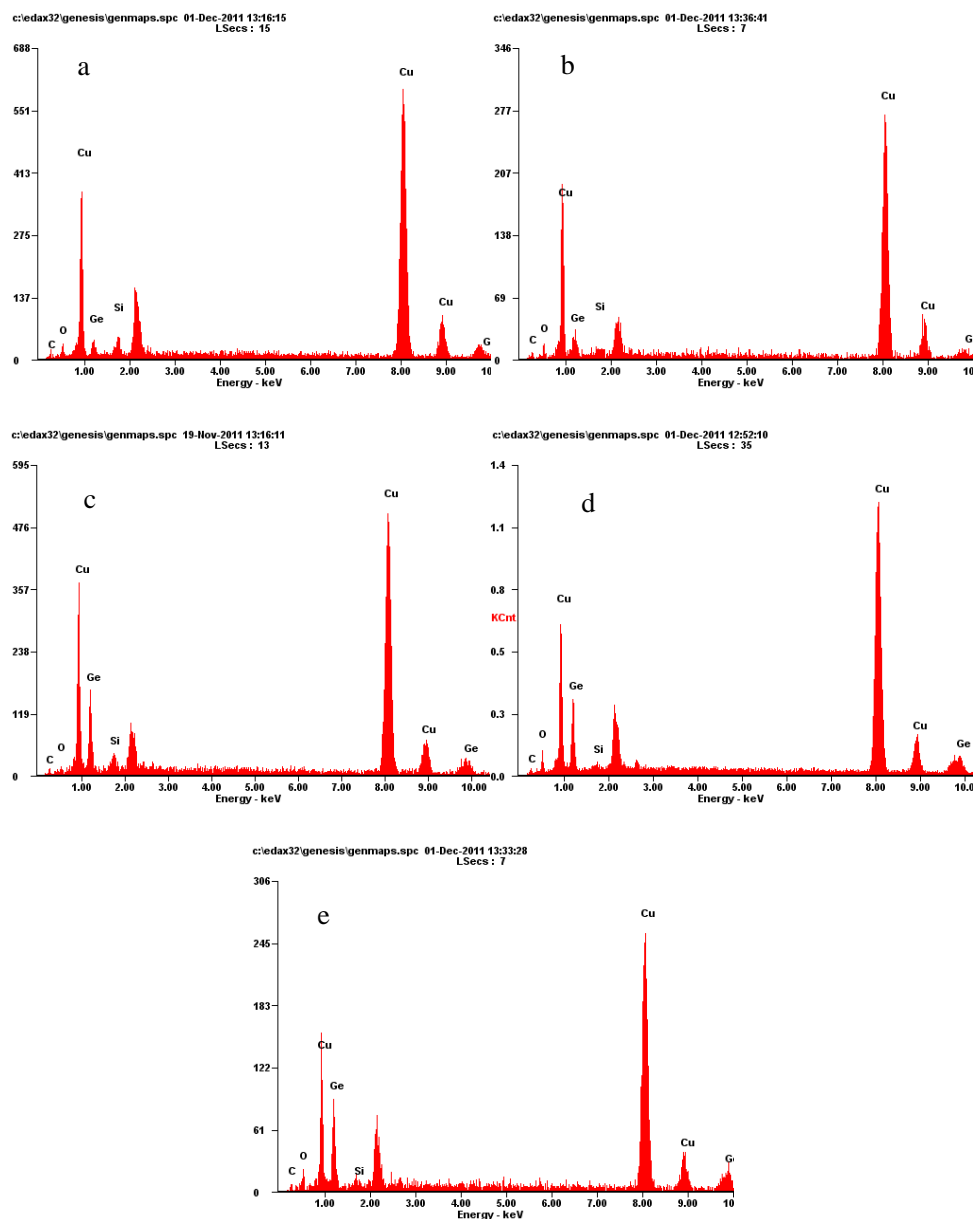

These figures show the EDX analysis of  $\text{Si}_x\text{Ge}_{1-x}$  films electrodeposited from the prepared electrolyte with different molar ratios of Si and Ge on Cu substrate at the potential of -1.9 V. Si:Ge = 4:1 (a), Si:Ge = 2:1 (b), Si:Ge = 1:1 (c), Si:Ge = 1:2 (d) and Si:Ge = 1:4 (e).
